# Supplementary material
Source: publisher figshare collection journal article supplement (https://tandf.figshare.com/articles/dataset/_/7889675)
Supplement: Supplementary file 1 [file 1]

Archive with 2 entries (2 files):
- Supplementary Materia.docx
- downloadFromZipFile.pdf
