# Supplementary material
Source: publisher figshare collection journal article supplement (https://tandf.figshare.com/articles/dataset/_/7889675)
Supplement: Supplementary file 1 [file 1 › Supplementary Materia.docx]

**Supplementary Material**

**Table 1. Baseline characteristics of included and excluded participants.**

| Characteristics | Included Total *p* value | | | | |
| --- | --- | --- | --- | --- | --- |
| Number of subjects |  | 3891 |  | 4071 |  |
| Demographics |  |  |  |  |  |
| Age, years |  | 62.55(10.89） |  | 62.49(10.90) | <0.001 |
| Male |  | 2495(64.12） |  | 2604(63.96） | 0.884 |
| Current cigarette smoking |  | 1442(37.06) |  | 1485(36.48) | 0.590 |
| Current alcohol drinking |  | 1212(31.15) |  | 1253(30.78) | 0.721 |
| Medical history |  |  |  |  |  |
| History of hypertension |  | 3066(78.80) |  | 3209(78.83) | 0.978 |
| History of hyperlipidemia |  | 268(6.89) |  | 277(6.80) | 0.894 |
| History of CHD |  | 425(10.92) |  | 444(10.91) | 1.000 |
| History of diabetes mellitus |  | 693(17.81) |  | 719(17.66) | 0.883 |
| Clinical features |  |  |  |  |  |
| NIHSS score |  | 4(2-7) |  | 4 (2-7) | 0.657 |
| SBP, mmHg |  | 166.14(16.92) |  | 164.86(16.90) | 0.877 |
| BMI, kg/m2 |  | 24.97(3.13) |  | 24.95(3.13) | 0.834 |
| Blood glucose, mmol/L |  | 5.80(5.10-7.20) |  | 5.80(5.10-7.20) | 0.803 |
| TG, mmol/L |  | 1.45(1.02-2.15) |  | 1.34(1.04-2.14) | 0.976 |
| TC, mmol/L |  | 4.98(4.28-5.71) |  | 4.99(4.29-5.72) | 0.821 |
| LDL-C, mmol/L |  | 2.87(2.29-3.49) |  | 2.88(2.29-3.49) | 0.892 |
| HDL-C, mmol/L |  | 1.22(1.03-1.48) |  | 1.22(1.03-1.49) | 0.761 |
| Ischemic stroke subtype† |  |  |  |  |  |
| Thrombotic |  | 3033(77.95) |  | 3107(77.87) | 0.935 |
| Embolic |  | 192(4.93) |  | 202(4.96) | 0.959 |
| Lacunar |  | 767(19.71) |  | 802(19.70) | 0.657 |

SBP: systolic blood pressure; DBP: diastolic blood pressure; BMI: body mass index; BG: blood glucose; TG: triglycerides; TC: total cholesterol; LDL-C: low density lipoprotein cholesterol; HDL-C: high density lipoprotein cholesterol; CHD, coronary heart disease; NIHSS, National Institute of Health Stroke Scale;

*Continuous variables are expressed as mean± standard deviation, or as median (interquartile range). Categorical variables are expressed as frequency (percent).
