# Supplementary material
Source: publisher figshare collection journal article supplement (https://tandf.figshare.com/articles/dataset/_/7889675)

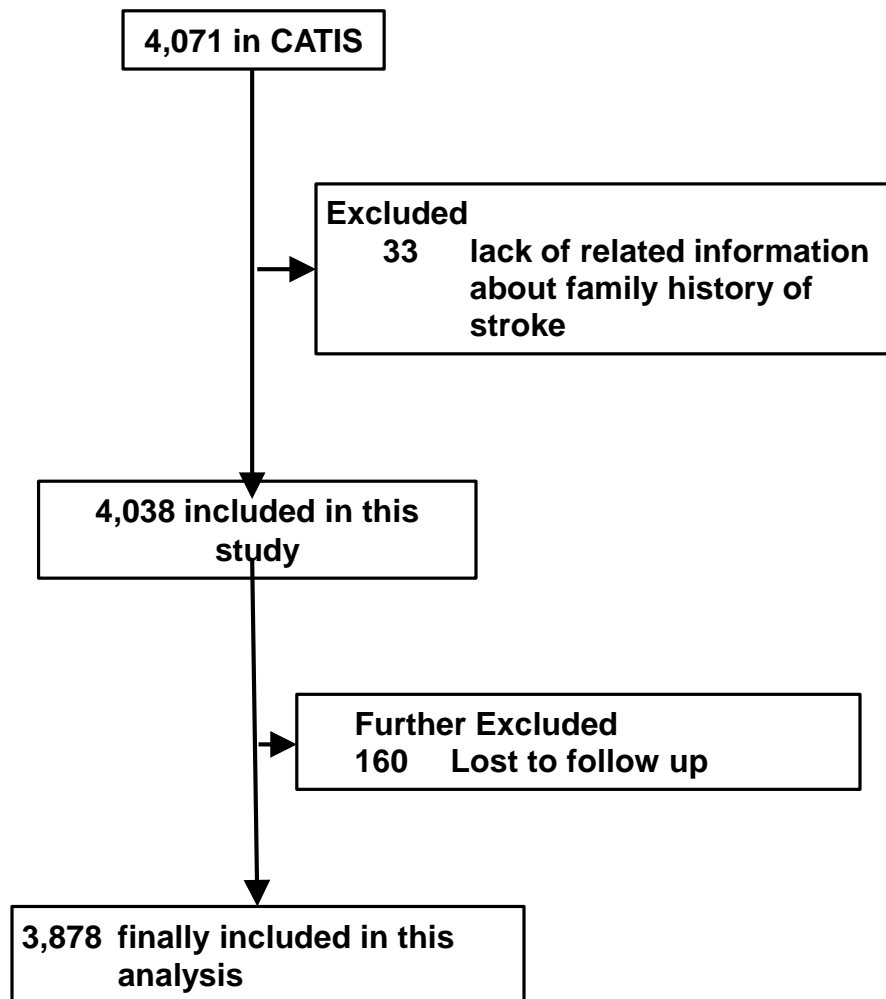

**Figure 1. Study Participant Flow Diagram**

Supplement: Supplementary file 1 [file 1 › downloadFromZipFile.pdf]
